# Supplementary figures and images for: Impact of Fibrous Microplastic Pollution on Commercial Seafood and Consumer Health: A Review
Source: MDPI journal article supplement (doi:10.3390/ani13111736), 2023-05-24

Figure S1. Flow chart outlining the criteria for the inclusion of studies in literature review.

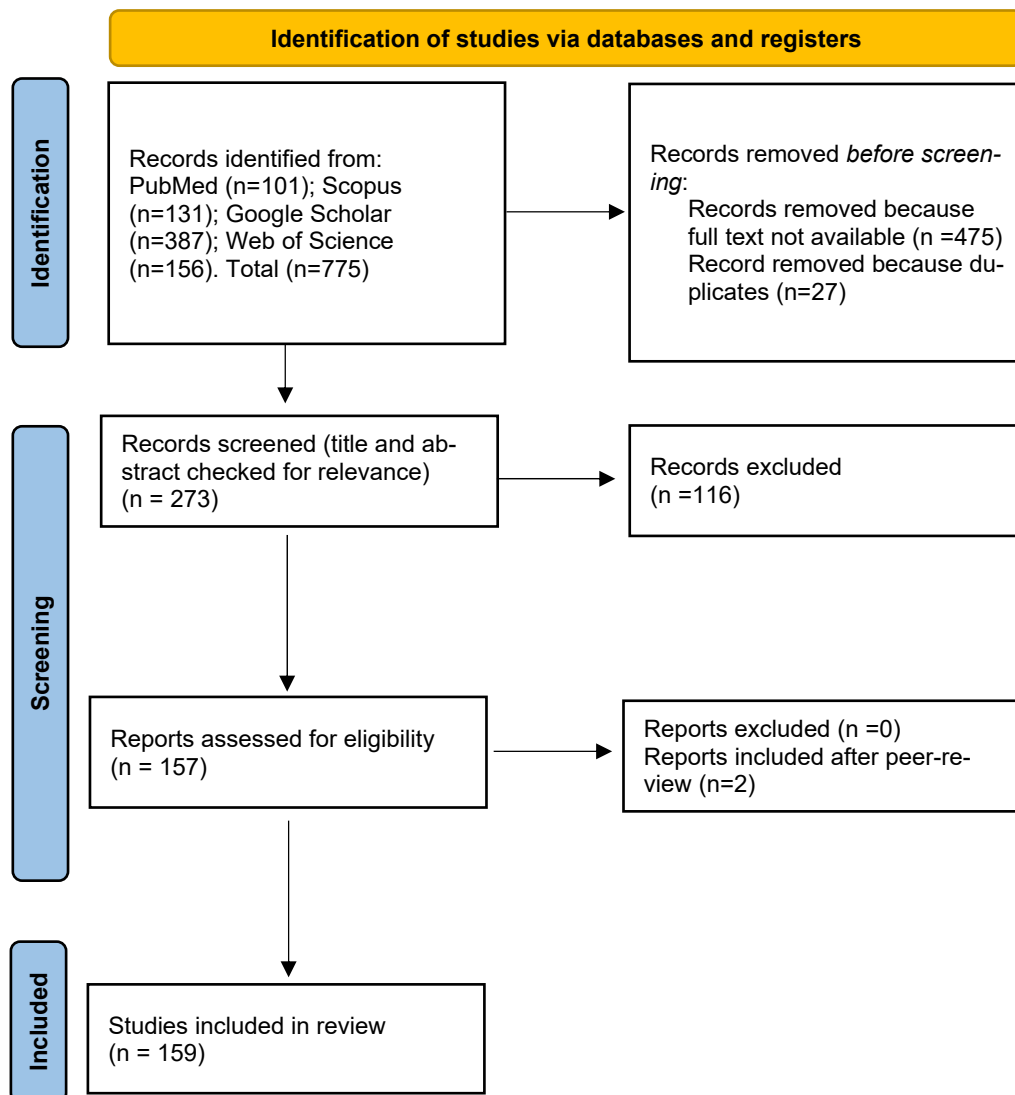

Supplement: s1 [file s1]
